# Supplementary material
Source: publisher site journal article supplement (https://kjim.org/upload/media/kjim-2024-080-Supplementary-Table-2.pdf)
Supplement: Supplementary file 1 [file kjim-2024-080-Supplementary-Table-2.pdf]

**Supplementary Table 2. Six-month clinical outcomes**

| Characteristic        | Evolocumab group (n = 50) | Non-evolocumab group (n = 45) | <i>p</i> value |
|-----------------------|---------------------------|-------------------------------|----------------|
| All death             | 1 (2.0)                   | 3 (6.7)                       | 0.435          |
| Cardiac death         | 1 (2.0)                   | 2 (4.4)                       | 0.212          |
| Myocardial infarction | 1 (2.0)                   | 0 (0)                         | 0.739          |
| Stroke                | 1 (2.0)                   | 3 (6.7)                       | 0.156          |
| Hemorrhagic stroke    | 0 (0)                     | 2 (4.4)                       | 0.358          |
| All revascularization | 2 (4.0)                   | 1 (2.2)                       | 0.316          |
| All bleeding          | 1 (2.0)                   | 3 (6.7)                       | 0.619          |
| TIMI major            | 0 (0)                     | 2 (4.4)                       | 0.239          |
| TIMI minor            | 1 (2.0)                   | 1 (2.2)                       | 0.875          |
| Myalgia               | 2 (4.0)                   | 1 (2.2)                       | 0.538          |
| Fatigue               | 1 (2.0)                   | 1 (2.2)                       | 0.812          |

Values are presented as number (%).

TIMI, Thrombolysis in Myocardial Infarction classification.
